# Supplementary material
Source: MDPI journal article supplement (https://www.mdpi.com/2076-0760/12/7/396)
Supplement: s1 [file s1]

## Supplementary File

### Complete search strategy

((TI=(género\* OR gender\*) NOT WC=(" Endocrinology Metabolism" OR "Oncology" OR "Urology Nephrology" OR "Medicine General Internal" OR "Nutrition Dietetics" OR "Cardiac Cardiovascular Systems" OR "Rheumatology" OR "Clinical Neurology" OR "Peripheral Vascular Disease" OR "Reproductive Biology" OR "Pathology" OR "Infectious Diseases" OR "Pharmacology Pharmacy" OR "Physiology" OR "Immunology" OR "Gastroenterology Hepatology" OR "Biochemistry Molecular Biology" OR "Respiratory System" OR "Dermatology" OR "Genetics Heredity" OR "Sports Sciences" OR "Hematology" OR "Orthopedics" OR "Microbiology" OR "Radiology Nuclear Medicine Medical Imaging" OR "Tropical Medicine" OR "Allergy" OR "Anesthesiology" OR "Biophysics" OR "Plant Sciences" OR "Virology" OR "Medical Laboratory Technology" OR "Parasitology" OR "Cell Biology" OR "Dentistry Oral Surgery Medicine" OR "Toxicology" OR "Zoology" OR "Anatomy Morphology" OR "Optics" OR "Transplantation" OR "Critical Care Medicine" OR "Evolutionary Biology" OR "Medicine Legal" OR "Agriculture Dairy Animal Science" OR "Biotechnology Applied Microbiology" OR "Developmental Biology" OR "Marine & Freshwater Biology" OR "Mycology" OR "Primary Health Care" OR "Veterinary Sciences"))

OR

(TI=(transex\* OR transexual\* OR intersexua\* OR homossexua\* OR heterossexual\* OR bissexua\* OR heterosexual\* OR homosexua\* OR bisexua\* OR transgener\* OR transgender\* OR pansexual\* OR assexual\* OR asexual\* OR "não-binário" OR "non-binary" OR demissexual\* OR demisexual\* OR cisgener\* OR cisgender\* OR feminist\* OR feminism\* OR machist\* OR machism\* OR sexist\* OR sexism\* OR homofobi\* OR homophobi\* OR matriarc\* OR patriarc\* OR motherhood OR maternidade OR empoderamento\* OR empowerment\* OR misogin\* OR misogyn\* OR androcentr\* OR sororidad\* OR sororit\* OR mulherismo\* OR womanism\* OR \*feminismo OR \*feminism OR "violência contra a mulher" OR "same-sex marriage" OR "violence against woman" OR "violência contra as mulheres" OR "violence against women" OR feminicid\* OR femicid\* OR queer\* OR transviad\* OR homoaf\* OR gay OR gays OR lesbica\* OR lesbian\* OR bicha OR bichas OR faggot\* OR sapata\* OR heteronormativ\* OR interseccional\* OR intersectional\* OR travesti\* OR transex\* OR "pink money" OR "drag queen\*" OR "drag king\*" OR crossdress\* OR LGBT\* OR GLBT\* OR LGBTQ\* OR LBTT\* OR quiltbag\* OR "divisão sexual do trabalho" OR "sexual division of labor" OR "trabalho feminino" OR "female work" OR "trabalho das mulheres" OR "women's work" OR "trabalho da mulher" OR "woman work" OR "dupla jornada" OR "tripla jornada" OR "trabalho reprodutivo" OR "reproductive work" OR feminização OR feminilização OR feminization OR feminiliza\* OR "trabalho doméstico" OR housework OR prostitu\* OR "sexual worker\*" OR "work-life balance" OR "work-family balance" OR conjugali\*))

OR

(WC=Women's Studies)

OR

((ts=("gender stud\*") NOT ts=("gender students")) OR (ts=("gender stud\*") NOT ts=("gender, study")) OR (ts=("gender stud\*") NOT ts=("gender, student")) OR (ts=("feminist stud\*")) OR (ts=("women's stud\*"))))

AND AD=(Portugal)

*Timespan: 1995-01-01 to 2021-12-31 (Publication Date)*
